# Supplementary material
Source: ML conference proceedings conference paper supplement (https://openaccess.thecvf.com/content/ACCV2022/html/Ju_Self-Supervised_Dehazing_Network_ACCV_2022_paper.html)
Supplement: Supplementary file 1 [file Ju_Self-Supervised_Dehazing_Network_ACCV_2022_supplemental.pdf]

# Supplementary Material: Self-Supervised Dehazing Network Using Physical Priors

Gwangjin Ju<sup>1</sup>, Yeongcheol Choi<sup>2</sup>, Donggun Lee<sup>1</sup>, Jee Hyun Paik<sup>2</sup>,  
Gyeongha Hwang<sup>3</sup>, and Seungyong Lee<sup>1\*</sup>

<sup>1</sup> POSTECH, Pohang, Korea  
{[gwangjin](mailto:gwangjin@postech.ac.kr), [dalelee](mailto:dalelee@postech.ac.kr), [leesy](mailto:leesy@postech.ac.kr)}@postech.ac.kr  
<sup>2</sup> POSCO ICT, Pohang, Korea  
{[ycchoi](mailto:ycchoi@poscoict.com), [jeehyun100](mailto:jeehyun100@poscoict.com)}@poscoict.com  
<sup>3</sup> Yeungnam University, Gyeongsan, Korea  
[ghhwang@yu.ac.kr](mailto:ghhwang@yu.ac.kr)

In this supplementary material, we provide more comparisons between our proposed SSDN and previous baselines as well as more experimental results of our proposed SSDN. In the following sections, ours-outdoor is the model defined in Sec. 5 of our main paper.

We first provide a comparison result on OTS outdoor as shown in Fig. 1 and Table 1. We then show more comparison results on I-Haze as shown in Fig. 2 and Table 2. As shown in the figure, I-Haze includes challenging hazy images. We also provide more experimental results on OTS outdoor dataset in Fig. 3.

**Table 1.** Quantitative results of other methods and ours on the OTS outdoor, a synthetic hazy dataset on outdoor images. Both our method and DehazeNet show similar results to quantitative results on HSTS synthetic dataset since both OTS and HSTS are synthetic outdoor dataset.

| Metrics | Supervised Method    |        | Prior-based Method     |
|---------|----------------------|--------|------------------------|
|         | DehazeNet            |        | DCP                    |
| PSNR    | <b>22.61</b>         |        | 17.34                  |
| SSIM    | <b>0.8640</b>        |        | 0.8444                 |
| Metrics | Unsupervised Methods |        | Self-Supervised Method |
|         | DDIP                 | YOLY   | Ours-outdoor           |
| PSNR    | 13.28                | 15.93  | 19.09                  |
| SSIM    | 0.3734               | 0.4386 | 0.8499                 |

---

\* ORCID IDs: {0000-0003-1006-8351}, {0000-0003-2525-873X}, {0000-0001-6482-8892}, {0000-0001-5485-2602}, {0000-0001-9791-8130}, {0000-0002-8159-4271}

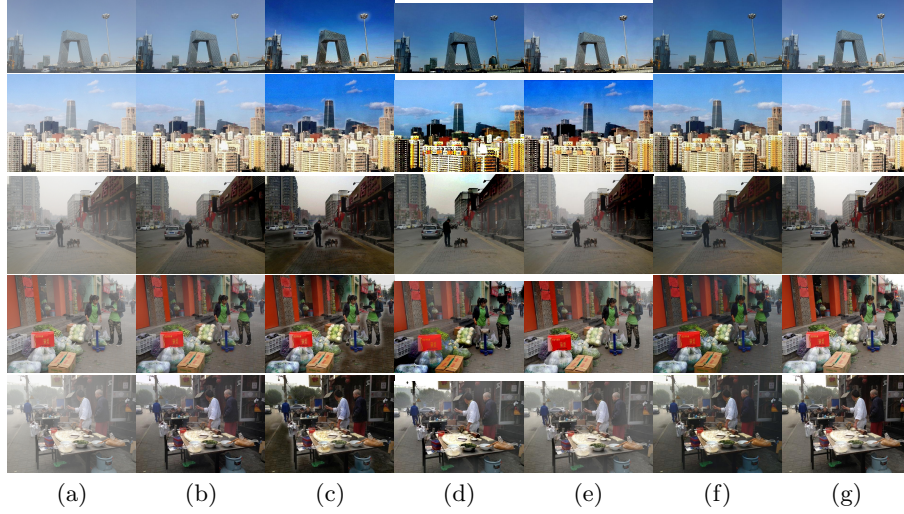

**Fig. 1.** Dehazing results of ours and other methods on OTS outdoor. (a) input hazy images, (b) DehazeNet, (c) DCP, (d) DDIP, (e) YOLY, (f) ours-outdoor, and (g) GT clean images. (d) and (e) have different image sizes since the public code of DDIP and YOLY crops the input image.

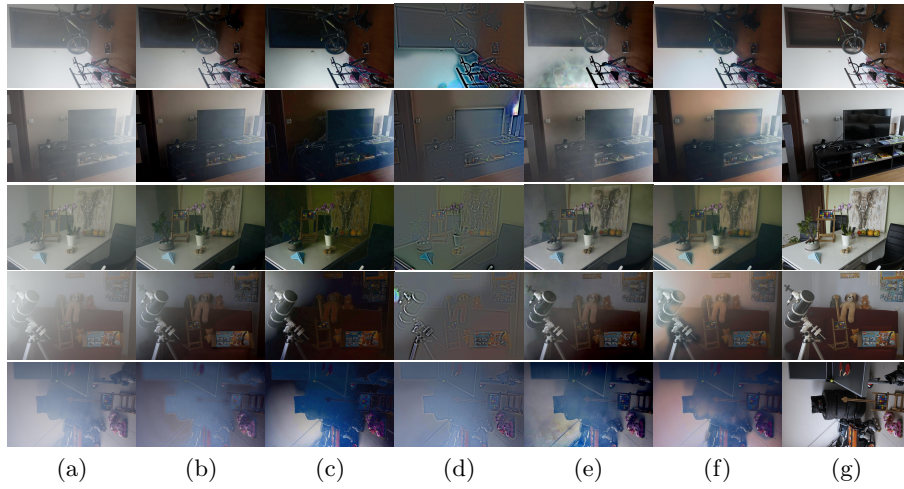

**Fig. 2.** Dehazing results of ours and other methods on I-Haze. (a) input hazy images, (b) DehazeNet, (c) DCP, (d) DDIP, (e) YOLY, (f) ours-outdoor, and (g) GT clean images. (d) and (e) have different image sizes since the public code of DDIP and YOLY crops the input image.

**Table 2.** Quantitative results of other methods and ours on the I-Haze, a real paired hazy dataset on indoor images. The performance is degraded over all methods because I-Haze includes images with non-uniform dense haze. However, ours dehazes the image although it has not seen any real dense haze thanks to its domain generalization performance.

| Metrics | Supervised Method    |        | Prior-based Method     |
|---------|----------------------|--------|------------------------|
|         | DehazeNet            |        | DCP                    |
| PSNR    | 14.43                |        | 11.98                  |
| SSIM    | 0.6948               |        | 0.5615                 |
| Metrics | Unsupervised Methods |        | Self-Supervised Method |
|         | DDIP                 | YOLY   | Ours-outdoor           |
| PSNR    | 12.88                | 14.94  | <b>15.80</b>           |
| SSIM    | 0.6659               | 0.6434 | <b>0.7631</b>          |

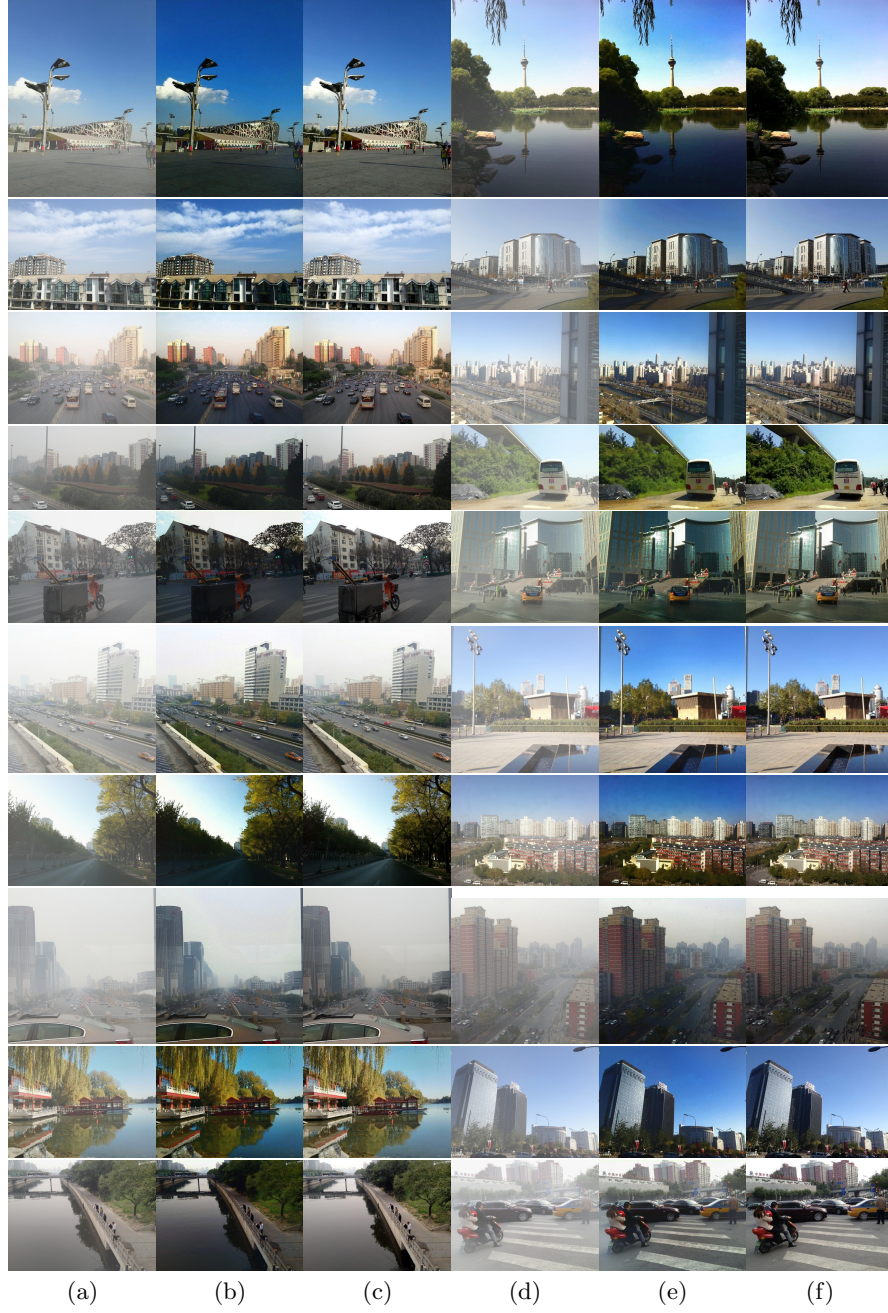

**Fig. 3.** More dehazing results on OTS outdoor dataset by our proposed SSDN. (a), (d) input hazy images, (b), (e) output dehazed images, and (c), (f) GT clear images.
